# Supplementary material for: Ferroelastic domains and phase transitions in organic–inorganic hybrid perovskite CH3NH3PbBr3
Source: Royal Society of Chemistry journal article supplement (doi:10.1039/d0tc05618a), 2021-01-01
Supplement: d0tc05618a1.pdf [file d0tc05618a1.pdf]

## ARTICLE

Received 00th January 20xx,  
Accepted 00th January 20xx

DOI: 10.1039/x0xx00000x

## Supporting Information

### **Ferroelastic Domains and Phase Transitions in Organic-Inorganic Hybrid Perovskite CH<sub>3</sub>NH<sub>3</sub>PbBr<sub>3</sub>**

Maryam Bari<sup>\*a</sup>, Alexei A. Bokov<sup>\* a\*</sup> and Zuo-Guang Ye<sup>a\*</sup>

---

*a Department of Chemistry and 4D LABS, Simon Fraser University, Burnaby, British Columbia, V5A 1S6, Canada*

♣ These authors contributed equally to this work.

\*Corresponding Author. E-mails: abokov@sfu.ca and zye@sfu.ca

Electronic Supplementary Information (ESI) available: [details of any supplementary information available should be included here]. See

DOI: 10.1039/x0xx00000x

**Table S1.** Permissible extinction directions and orientations of ferroelastic domain walls which can be observed by polarized light microscope in (001), (110) and (111) crystal plates after transformation from cubic  $m\bar{3}m$  phase to different ferroelastic phases: tetragonal (T), rhombohedral (R), orthorhombic ( $O_P$  and  $O_S$ ).  $\delta$  is the angle between crossed polarizers and  $\langle 100 \rangle$  directions for (001) plates and the angle between crossed polarizers and  $[\bar{1}10]$  direction for (110) and (111) plates at which the extinction is observed; a filled circle ( $\bullet$ ) indicates the possibility of domains which are in extinction at any  $\delta$ ; a crossed circle ( $\oplus$ ) indicates the possibility of regions without extinction at any  $\delta$ . The  $\varphi$  is a permissible angle between a domain wall on the crystal surface and  $\langle 100 \rangle$  or  $\langle \bar{1}10 \rangle$  directions (walls which are *not* perpendicular to a crystal surface are listed in brackets); angle  $\varphi_1$  (for S walls) may adopt any values, except for  $0^\circ$ ,  $90^\circ$  and  $\pm 45^\circ$ .

| Phase | 100                                      |                                                                                                                 | 110                                                    |                                                                                           | 111                                                             |                                                                                                             |
|-------|------------------------------------------|-----------------------------------------------------------------------------------------------------------------|--------------------------------------------------------|-------------------------------------------------------------------------------------------|-----------------------------------------------------------------|-------------------------------------------------------------------------------------------------------------|
|       | $\delta$                                 | $\varphi$                                                                                                       | $\delta$                                               | $\varphi$                                                                                 | $\delta$                                                        | $\varphi$                                                                                                   |
| T     | $0^\circ/90^\circ, \bullet$              | $(0^\circ/90^\circ), \pm 45^\circ$                                                                              | $0^\circ/90^\circ$                                     | $90^\circ, (\pm 35^\circ)$                                                                | $0^\circ/90^\circ, \pm 30^\circ, \pm 60^\circ, \oplus$          | $(0^\circ), 90^\circ, \pm 30^\circ, (\pm 60^\circ)$                                                         |
| R     | $\pm 45^\circ$                           | $0^\circ/90^\circ, (0^\circ/90^\circ), \pm 45^\circ$                                                            | $0^\circ/90^\circ, \pm 35^\circ, \pm 55^\circ, \oplus$ | $0^\circ/90^\circ, (90^\circ), (\pm 35^\circ), (\pm 55^\circ)$                            | $0^\circ/90^\circ, \pm 30^\circ, \pm 60^\circ, \oplus, \bullet$ | $(0^\circ), 90^\circ, \pm 30^\circ, (\pm 60^\circ)$                                                         |
| $O_P$ | $0^\circ/90^\circ$                       | $(0^\circ/90^\circ), \pm 45^\circ$                                                                              | $0^\circ/90^\circ$                                     | $90^\circ, (\pm 35^\circ)$                                                                | $0^\circ/90^\circ, \pm 30^\circ, \pm 60^\circ, \oplus$          | $(0^\circ), 90^\circ, \pm 30^\circ, (\pm 60^\circ)$                                                         |
| $O_S$ | $0^\circ/90^\circ, \pm 45^\circ, \oplus$ | $0^\circ/90^\circ, (0^\circ/90^\circ), \pm 45^\circ, (\pm 45^\circ), (\pm \varphi_1), (90^\circ \pm \varphi_1)$ | $0^\circ/90^\circ, \pm 35^\circ, \pm 55^\circ$         | $0^\circ, (0^\circ), 90^\circ, (90^\circ), (\pm 35^\circ), (\pm 55^\circ), \pm \varphi_1$ | $0^\circ/90^\circ, \pm 30^\circ, \pm 60^\circ, \oplus$          | $(0^\circ), 90^\circ, \pm 30^\circ, (\pm 60^\circ), (\pm 30^\circ \pm \varphi_1), (90^\circ \pm \varphi_1)$ |

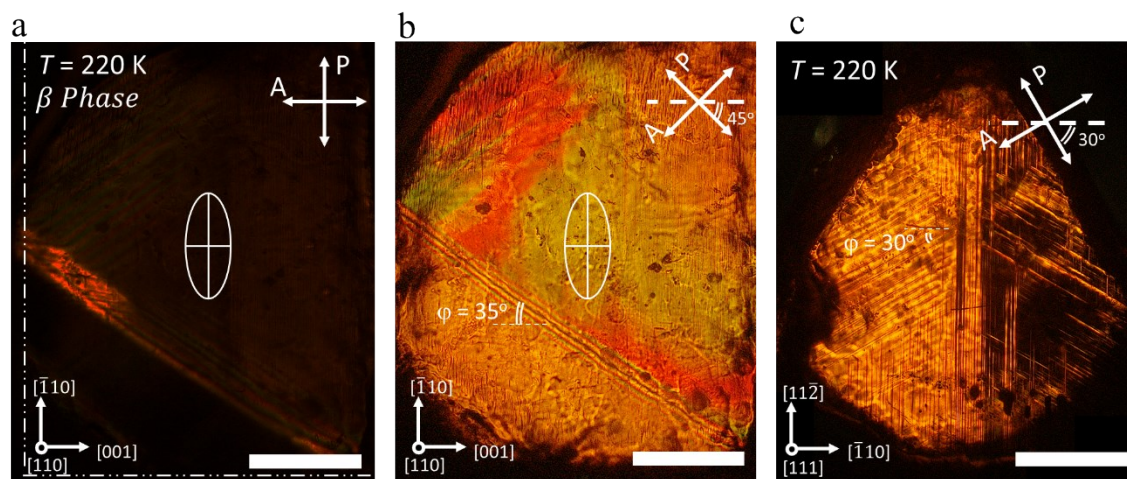

**Figure S1.** The domain structure of (110) MAPbBr<sub>3</sub> plate polished to the thickness of  $t \approx 0.2$  mm in  $\beta$  phase with crossed polarizers (a) parallel to and (b) at a  $\delta = 45^\circ$  to the  $\langle 100 \rangle$ . A bright stripe-like area appears along the domain wall with angle  $\varphi = 35^\circ$ , which is the result of the light refraction on the inclined domain wall formed between two domains. The extinction angle of  $\delta = 0/90^\circ$  and domain wall angle of  $\varphi = 35^\circ$  are compatible with T phase. (c) The (111) plate in  $\beta$  phase with crossed polarizers at  $\delta = 30^\circ$  to the  $\langle \bar{1}10 \rangle$  direction. The crystal shows extinction at the positions of polarizers separated by the angle of  $\delta = 30^\circ$  to  $\langle \bar{1}10 \rangle$ , which is allowed at any crystal symmetry according to Table S1. The crystal contains a large number of fine laminar domains with the size of  $\sim 20$   $\mu\text{m}$ , oriented at angles  $\varphi \approx 90^\circ, \pm 30^\circ$  to  $\langle \bar{1}10 \rangle$ , which also can exist in any system. The temperature, the directions of crystallographic axes, indicatrix axis, polarizer directions, and the angles ( $\delta, \varphi$ ) are indicated, scale bars, 500  $\mu\text{m}$ .

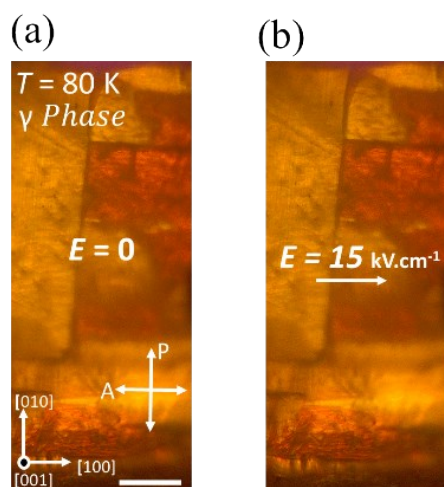

**Figure S2.** PLM images of a (001) oriented MAPbBr<sub>3</sub> crystal observed at 80 K in  $\gamma$  phase before (a) and after (b) application of an electric field  $E = 15$   $\text{kV cm}^{-1}$  along the [100] direction. The directions of crystallographic axes, the electric field, and the polarizers are indicated; scale bars = 200  $\mu\text{m}$

**Movie S1.** Application of electric field of 8  $\text{kV/cm}$  in  $\beta$  phase of MAPbBr<sub>3</sub> crystal at 230 K. The Joule heating leads to the tetragonal-cubic transition, and after removing the field, the crystal returns to the tetragonal phase.
